# Supplementary material for: Single Injection of Cross-Linked Hyaluronate in Knee Osteoarthritis: A 52-Week Double-Blind Randomized Controlled Trial
Source: MDPI journal article supplement (doi:10.3390/pharmaceutics14091783), 2022-08-25
Supplement: s1 [file s1]

**Supplementary Table S1.** Comparison of ultrasound inflammatory features between groups.

| Ultrasound features                  | HYAJOINT Plus           | Durolane                | Remark                        |
|--------------------------------------|-------------------------|-------------------------|-------------------------------|
| <i>Suprapatellar synovitis</i>       |                         |                         |                               |
| (SPS), n (%)                         | 8                       | 2                       | Grade I SPS<br>in all cases   |
| Baseline                             |                         |                         |                               |
| 4 weeks                              | 4 (50.0%)               | 0 (0.0%)                |                               |
| 12 weeks                             | 0 (0.0%) <sup>b</sup>   | 0 (0.0%)                |                               |
| 26 weeks                             | 1 (16.7%) <sup>b</sup>  | 0 (0.0%)                |                               |
| 39 weeks                             | 1 (16.7%) <sup>b</sup>  | 0 (0.0%)                |                               |
| 52 weeks                             | 0 (0.0%) <sup>b</sup>   | 0 (0.0%) <sup>a</sup>   |                               |
| <i>p</i> value                       | <0.001                  | 0.026                   |                               |
| <i>Suprapatellar effusion</i>        |                         |                         |                               |
| (SPE), n (%)                         | 18<br>(Gr. II: 1)       | 10<br>(Gr. II: 1)       | Grade I SPE<br>in other cases |
| Baseline                             |                         |                         |                               |
| 4 weeks                              | 9 (50.0%)               | 4 (40.0%)               |                               |
| 12 weeks                             | 4 (23.5%) <sup>a</sup>  | 3 (30.0%)               |                               |
| 26 weeks                             | 2 (11.8%) <sup>a</sup>  | 0 (0.0%)                |                               |
| 39 weeks                             | 4 (25.0%) <sup>b</sup>  | 2 (25.0%) <sup>b</sup>  |                               |
| 52 weeks                             | 8 (53.3%) <sup>c</sup>  | 3 (37.5%) <sup>b</sup>  |                               |
| <i>p</i> value                       | <0.001                  | 0.002                   |                               |
| <i>Medial compartment synovitis</i>  |                         |                         |                               |
| (MCS), n (%)                         | 31                      | 28                      | Grade I MCS<br>in all cases   |
| Baseline                             |                         |                         |                               |
| 4 weeks                              | 21 (67.7%)              | 21 (75.0%)              |                               |
| 12 weeks                             | 14 (46.7%) <sup>a</sup> | 10 (50.0%) <sup>a</sup> |                               |
| 26 weeks                             | 11 (37.9%) <sup>b</sup> | 7 (26.9%) <sup>b</sup>  |                               |
| 39 weeks                             | 13 (44.8%) <sup>b</sup> | 8 (36.4%) <sup>f</sup>  |                               |
| 52 weeks                             | 14 (48.3%) <sup>b</sup> | 6 (26.1%) <sup>e</sup>  |                               |
| <i>p</i> value                       | <0.001                  | <0.001                  |                               |
| <i>Lateral compartment synovitis</i> |                         |                         |                               |
| (LCS), n (%)                         | 17                      | 7                       | Grade I LCS<br>in all cases   |
| Baseline                             |                         |                         |                               |
| 4 weeks                              | 9 (52.9%)               | 4 (57.1%)               |                               |
| 12 weeks                             | 7 (43.8%) <sup>a</sup>  | 1 (14.3%)               |                               |
| 26 weeks                             | 5 (33.3%) <sup>b</sup>  | 2 (28.6%)               |                               |
| 39 weeks                             | 5 (33.3%) <sup>b</sup>  | 0 (0.0%) <sup>b</sup>   |                               |
| 52 weeks                             | 5 (33.3%) <sup>b</sup>  | 1 (20.0%) <sup>b</sup>  |                               |
| <i>p</i> value                       | <0.001                  | <0.001                  |                               |

$p$  value, the linear trend in percentage within the group was tested using the Cochran-Armitage trend test

<sup>a</sup>: one case missing; <sup>b</sup>: two cases missing; <sup>c</sup>: three cases missing; <sup>d</sup>: four cases missing;

<sup>e</sup>: five cases missing; <sup>f</sup>: six cases missing
